# Supplementary material
Source: ML conference proceedings conference paper supplement (https://proceedings.mlr.press/v103/van-camp19a.html)
Supplement: Supplementary file [file van-camp19a-supp.pdf]

## Appendix A. Proofs

**Proof** [Proof of Lemma 7] For the sake of brevity, we denote

$$K_{H,T}^1 := \{A \in \mathcal{L} : ((\exists h_1, h_2 \in A)(h_1(T) > 0 \text{ and } h_2(H) > 0)) \text{ or } A \cap \mathcal{L}_{>0}^s \neq \emptyset\},$$

$$K_{H,T}^2 := \text{Rs}(\{\{h_1, h_2\} : h_1, h_2 \in \mathcal{L}_{\leq 0}, (h_1(T), h_2(H)) > 0\}).$$

We will show (i) that  $\text{Posi}(\mathcal{L}_{>0}^s \cup \mathcal{A}) \subseteq K_{H,T}^1$ , (ii) that  $K_{H,T}^1 \subseteq K_{H,T}^2$ , and (iii) that  $K_{H,T}^2 \subseteq \text{Posi}(\mathcal{L}_{>0}^s \cup \mathcal{A})$ .

For (i)—to show that  $\text{Posi}(\mathcal{L}_{>0}^s \cup \mathcal{A}) \subseteq K_{H,T}^1$ —consider any gamble set  $A$  in  $\text{Posi}(\mathcal{L}_{>0}^s \cup \mathcal{A})$ . This means that there are  $n$  in  $\mathbb{N}$ ,  $A_1, \dots, A_n$  in  $\mathcal{L}_{>0}^s \cup \mathcal{A}$ , and, for all  $f_{1:n}$  in  $\times_{k=1}^n A_k$ , coefficients  $\lambda_{1:n}^{f_{1:n}} > 0$ , such that  $A = \left\{ \sum_{k=1}^n \lambda_k^{f_{1:n}} f_k : f_{1:n} \in \times_{k=1}^n A_k \right\}$ . Without loss of generality, assume that  $A_1, \dots, A_\ell \in \mathcal{A}$  and  $A_{\ell+1}, \dots, A_n \in \mathcal{L}_{>0}^s$  for some  $\ell$  in  $\{0, \dots, n\}$ . Therefore, we may denote, also without loss of generality,  $A_1 = \{-\mathbb{I}_{\{H\}} + \varepsilon_1, -\mathbb{I}_{\{T\}} + \delta_1\}, \dots, A_\ell = \{-\mathbb{I}_{\{H\}} + \varepsilon_\ell, -\mathbb{I}_{\{T\}} + \delta_\ell\}, A_{\ell+1} = \{g_{\ell+1}\}, \dots, A_n = \{g_n\}$ , where  $\varepsilon_1, \delta_1, \dots, \varepsilon_\ell, \delta_\ell$  are elements of  $\mathbb{R}_{>0}$  and  $g_{\ell+1}, \dots, g_n$  elements of  $\mathcal{L}_{>0}$ . If  $\ell = 0$  or  $\lambda_{1:n}^{f_{1:n}} = 0$  for some  $f_{1:n}$  in  $\times_{k=1}^n A_k$ —and therefore necessarily  $\lambda_{\ell+1:n}^{f_{1:n}} > 0$ —then we have that  $\sum_{k=1}^n \lambda_k^{f_{1:n}} f_k = \sum_{k=\ell+1}^n \lambda_k^{f_{1:n}} g_k$  is a gamble in  $\mathcal{L}_{>0}$ , so we find that  $\left\{ \sum_{k=1}^n \lambda_k^{f_{1:n}} f_k : f_{1:n} \in \times_{k=1}^n A_k \right\} = A \cap \mathcal{L}_{>0}^s \neq \emptyset$ . If, on the other hand,  $\ell \geq 1$  and  $\lambda_{1:n}^{f_{1:n}} \neq 0$ —and hence  $\lambda_{1:\ell}^{f_{1:n}} > 0$ —for every  $f_{1:n}$  in  $\times_{k=1}^n A_k$ , then for the two sequences of gambles  $f_{1:n}^H = (f_1^H, \dots, f_n^H) := (-\mathbb{I}_{\{H\}} + \varepsilon_1, \dots, -\mathbb{I}_{\{H\}} + \varepsilon_\ell, g_{\ell+1}, \dots, g_n)$  and  $f_{1:n}^T = (f_1^T, \dots, f_n^T) := (-\mathbb{I}_{\{T\}} + \delta_1, \dots, -\mathbb{I}_{\{T\}} + \delta_\ell, g_{\ell+1}, \dots, g_n)$  in  $\times_{k=1}^n A_k$  we have that

$$\begin{aligned} h_1 &:= \sum_{k=1}^n \lambda_k^{f_{1:n}^H} f_k^H = \sum_{k=1}^{\ell} \lambda_k^{f_{1:n}^H} f_k^H + \sum_{k=\ell+1}^n \lambda_k^{f_{1:n}^H} g_k \\ &\geq \sum_{k=1}^{\ell} \lambda_k^{f_{1:n}^H} f_k^H \\ &= -\mathbb{I}_{\{H\}} \sum_{k=1}^{\ell} \lambda_k^{f_{1:n}^H} + \sum_{k=1}^{\ell} \lambda_k^{f_{1:n}^H} \varepsilon_k \end{aligned}$$

and, similarly,

$$h_2 := \sum_{k=1}^n \lambda_k^{f_{1:n}^T} f_k^T \geq -\mathbb{I}_{\{T\}} \sum_{k=1}^{\ell} \lambda_k^{f_{1:n}^T} + \sum_{k=1}^{\ell} \lambda_k^{f_{1:n}^T} \delta_k,$$

so  $h_1(T) \geq \sum_{k=1}^{\ell} \lambda_k^{f_{1:n}^H} \varepsilon_k > 0$  and  $h_2(H) \geq \sum_{k=1}^{\ell} \lambda_k^{f_{1:n}^T} \delta_k > 0$ . Note that both  $h_1$  and  $h_2$  belong to  $A$ , so we find that  $(\exists h_1, h_2 \in A)(h_1(T) > 0 \text{ and } h_2(H) > 0)$ . Therefore indeed  $\text{Posi}(\mathcal{L}_{>0}^s \cup \mathcal{A}) \subseteq K_{H,T}^1$ .

For (ii)—to show that  $K_{H,T}^1 \subseteq K_{H,T}^2$ —consider any gamble set  $A$  in  $K_{H,T}^1$ . Then (a)  $h_1(T) > 0$  and  $h_2(H) > 0$  for some  $h_1$  and  $h_2$  in  $A$ , or (b)  $A \cap \mathcal{L}_{>0}^s \neq \emptyset$ . If (a), then  $h_1, h_2 \in \mathcal{L}_{\leq 0}$ , and  $(h_1(T), h_2(H)) > 0$ , so  $A \in K_{H,T}^2$ . If (b), then  $h > 0$  for some  $h$  in  $A$ , so for  $h_1 := h_2 := h$  trivially  $h_1, h_2 \in \mathcal{L}_{\leq 0}$ , and  $(h_1(T), h_2(H)) = (h(T), h(H)) > 0$ , whence  $A \in K_{H,T}^2$ . We conclude that indeed  $K_{H,T}^1 \subseteq K_{H,T}^2$ .

For (iii)—to show that  $K_{H,T}^2 \subseteq \text{Posi}(\mathcal{L}_{>0}^s \cup \mathcal{A})$ —consider any gamble set  $A$  in  $K_{H,T}^2$ . Then  $A \supseteq \{h_1, h_2\} \setminus \mathcal{L}_{\leq 0} = \{h_1, h_2\}$  for some  $h_1$  and  $h_2$  in  $\mathcal{L}_{\leq 0}$  such that  $(h_1(T), h_2(H)) > 0$ . Without loss of generality, rename the gambles in

$$A = \{f_1^I, \dots, f_{n_I}^I, f_1^{II}, \dots, f_{n_{II}}^{II}, f_1^{III}, \dots, f_{n_{III}}^{III}, f_1^{IV}, \dots, f_{n_{IV}}^{IV}\},$$

with  $n_I, n_{II}, n_{III}$  and  $n_{IV}$  in  $\{0\} \cup \mathbb{N}$  such that  $n := 2n_I + n_{II} + 2n_{III} + n_{IV} \geq 1$ , gambles  $f_1^I, \dots, f_{n_I}^I$  in the positive quadrant  $\mathcal{L}_{>0}$ , gambles  $f_1^{II}, \dots, f_{n_{II}}^{II}$  in the second quadrant  $\mathcal{L}_{II} := \{f \in \mathcal{L} : f(H) < 0 < f(T)\}$ , gambles  $f_1^{III}, \dots, f_{n_{III}}^{III}$  in the negative quadrant  $\mathcal{L}_{\leq 0}$ , and gambles  $f_1^{IV}, \dots, f_{n_{IV}}^{IV}$  in the fourth quadrant  $\mathcal{L}_{IV} := \{f \in \mathcal{L} : f(T) < 0 < f(H)\}$ . We must show that  $A$  belongs to  $\text{Posi}(\mathcal{L}_{>0}^s \cup \mathcal{A})$ . To this end, we will construct  $n$  gamble sets  $A_1, \dots, A_n$  and, for every  $f_{1:n}$  in  $\times_{k=1}^n A_k$ , coefficients  $\lambda_{1:n}^{f_{1:n}} > 0$  such that  $A = \left\{ \sum_{k=1}^n \lambda_k^{f_{1:n}} f_k : f_{1:n} \in \times_{k=1}^n A_k \right\}$ .

Let  $A_1 := \{g_1\} \in \mathcal{L}_{>0}^s, \dots, A_{n_I} := \{g_{n_I}\} \in \mathcal{L}_{>0}^s$ . We consider the additional  $n_{II}$  gamble sets  $A_{n_I+1} := \dots := A_{2n_I} := \{-\mathbb{I}_{\{H\}} + 1, -\mathbb{I}_{\{T\}} + 1\} \in \mathcal{A}$ , in order to have enough freedom in selecting the coefficients  $\lambda_{1:n}^{f_{1:n}} > 0$  later on. For every  $i$  in  $\{1, \dots, n_{II}\}$ , let  $A_{2n_I+i} := \{-\mathbb{I}_{\{H\}} + \varepsilon_i, -\mathbb{I}_{\{T\}} + \delta\} \in \mathcal{A}$  with  $\varepsilon_i := \frac{f_i^{IV}(T)}{f_i^{II}(T) - f_i^{II}(H)} > 0$  and  $\delta := \frac{f_i^{IV}(H)}{f_i^{IV}(H) - f_i^{IV}(T)} > 0$  if  $n_{IV} \geq 1$ , otherwise  $\delta := 1$ . For every  $i$  in  $\{1, \dots, n_{III}\}$ , if  $f_i^{III} \neq 0$ , let  $A_{2n_I+n_{II}+i} := \{-\mathbb{I}_{\{H\}} + \frac{1}{4}, -\mathbb{I}_{\{T\}} + 1\} \in \mathcal{A}$  and  $A_{2n_I+n_{II}+n_{III}+i} := \{-\mathbb{I}_{\{H\}} + 1, -\mathbb{I}_{\{T\}} + \frac{1}{4}\} \in \mathcal{A}$ ; if  $f_i^{III} = 0$ , let  $A_{2n_I+n_{II}+i} := A_{2n_I+n_{II}+n_{III}+i} := \{-\mathbb{I}_{\{H\}} + \frac{1}{2}, -\mathbb{I}_{\{T\}} + \frac{1}{2}\} \in \mathcal{A}$ . For every  $i$  in  $\{1, \dots, n_{IV}\}$ , let  $A_{2n_I+n_{II}+2n_{III}+i} := \{-\mathbb{I}_{\{H\}} + 1, -\mathbb{I}_{\{T\}} + \delta_i\} \in \mathcal{A}$  with  $\delta_i := \frac{f_i^{IV}(H)}{f_i^{IV}(H) - f_i^{IV}(T)} > 0$ .

The set  $\times_{k=1}^n A_k$  contains  $2^{n-n_I} = 2^{n_I+n_{II}+2n_{III}+n_{IV}}$  sequences. Each such sequence  $f_{1:n}$  is characterised by a choice of  $f_i$  in the binary set  $A_i$ —which we will denote by  $\{g_i^H, g_i^T\}$ , where  $g_i^H$  is the gamble in  $A_i$  of the form  $-\mathbb{I}_{\{H\}} + \varepsilon$  and  $g_i^T$  the gamble in  $A_i$  of the form  $-\mathbb{I}_{\{T\}} + \delta$ —, for every  $i$  in  $\{n_I+1, \dots, n\}$ . For the first  $n_I$  entries  $f_{1:n_I}$  of  $f_{1:n}$  we have no choice but to chose  $f_{1:n_I} = g_{1:n_I}$ , since  $\times_{k=1}^{n_I} A_k$  is the singleton  $\{g_{1:n_I}\}$ .

For any sequence  $f_{1:n}$  in  $\times_{k=1}^n A_k$ , define  $n$  real coefficients  $\lambda_{1:n}^{f_{1:n}}$  as follows:

- Situation (a): If there is an  $i$  in  $\{2n_I+1, \dots, 2n_I+n_{II}\}$  such that

$$(f_{2n_I+1}, \dots, f_{i-1}, f_i, f_{i+1}, \dots, f_{2n_I+n_{II}+n_{III}},$$

$$\begin{aligned}
 & (f_{2n_1+n_{II}+n_{III}+1}, \dots, f_n) \\
 = & (g_{2n_1+1}^T, \dots, g_{i-1}^T, g_i^H, g_{i+1}^T, \dots, g_{2n_1+n_{II}+n_{III}}^T, \\
 & g_{2n_1+n_{II}+n_{III}+1}^H, \dots, g_n^H)
 \end{aligned}$$

or, in other words, such that  $f_i = g_i^H$ ,  $(\forall k \in \{2n_1 + 1, \dots, 2n_1 + n_{II} + n_{III}\} \setminus \{i\}) f_k = g_k^T$ , and  $(\forall k \in \{2n_1 + n_{II} + n_{III} + 1, \dots, n\}) f_k = g_k^H$ , then let

$$\begin{aligned}
 \lambda_i^{f_{1:n}} & := f_j^{\text{II}}(\text{T}) - f_j^{\text{II}}(\text{H}) > 0 \text{ for } j := i - 2n_1, \\
 \lambda_k^{f_{1:n}} & := 0 \text{ for all } k \text{ in } \{1, \dots, n\} \setminus \{i\}.
 \end{aligned}$$

- Situation (b): If there is an  $i$  in  $\{2n_1 + n_{II} + 2n_{III} + 1, \dots, n\}$  such that

$$\begin{aligned}
 & (f_{2n_1+1}, \dots, f_{2n_1+n_{II}+n_{III}}, \\
 & f_{2n_1+n_{II}+n_{III}+1}, \dots, f_{i-1}, f_i, f_{i+1}, \dots, f_n) \\
 = & (g_{2n_1+1}^T, \dots, g_{2n_1+n_{II}+n_{III}}^T, \\
 & g_{2n_1+n_{II}+n_{III}+1}^H, \dots, g_{i-1}^H, g_i^T, g_{i+1}^H, \dots, g_n^H),
 \end{aligned}$$

or, in other words, such that  $f_i = g_i^T$ ,  $(\forall k \in \{2n_1 + 1, \dots, 2n_1 + n_{II} + n_{III}\}) f_k = g_k^T$ , and  $(\forall k \in \{2n_1 + n_{II} + n_{III} + 1, \dots, n\} \setminus \{i\}) f_k = g_k^H$ , then let

$$\begin{aligned}
 \lambda_i^{f_{1:n}} & := f_j^{\text{IV}}(\text{H}) - f_j^{\text{IV}}(\text{T}) > 0 \\
 & \text{for } j := i - 2n_1 - n_{II} - 2n_{III}, \\
 \lambda_k^{f_{1:n}} & := 0 \text{ for all } k \text{ in } \{1, \dots, n\} \setminus \{i\}.
 \end{aligned}$$

- Situation (c): If there is an  $i$  in  $\{2n_1 + n_{II} + 1, \dots, 2n_1 + n_{II} + n_{III}\}$  such that

$$\begin{aligned}
 & (f_{2n_1+1}, \dots, f_{i-1}, f_i, f_{i+1}, \dots, f_{2n_1+n_{II}+n_{III}}, \\
 & f_{2n_1+n_{II}+n_{III}+1}, \dots, f_{n_{III}+i-1}, f_{n_{III}+i}, f_{n_{III}+i+1}, \dots, f_n) \\
 = & (g_{2n_1+1}^T, \dots, g_{i-1}^T, g_i^H, g_{i+1}^T, \dots, g_{2n_1+n_{II}+n_{III}}^T, \\
 & g_{2n_1+n_{II}+n_{III}+1}^H, \dots, g_{n_{III}+i-1}^H, g_{n_{III}+i}^T, g_{n_{III}+i+1}^H, \dots, g_n^H),
 \end{aligned}$$

or, in other words, such that  $f_i = g_i^H$ ,  $f_{n_{III}+i} = g_{n_{III}+i}^T$ ,  $(\forall k \in \{2n_1 + 1, \dots, 2n_1 + n_{II} + n_{III}\} \setminus \{i\}) f_k = g_k^T$  and  $(\forall k \in \{2n_1 + n_{II} + n_{III} + 1, \dots, n\} \setminus \{n_{III} + i\}) f_k = g_k^H$ , then let

$$\begin{aligned}
 \lambda_i^{f_{1:n}} & := \lambda_{n_{III}+i}^{f_{1:n}} := 1 \text{ if } f_{i-2n_1+n_{II}}^{\text{III}} = 0, \\
 \lambda_i^{f_{1:n}} & := -\frac{1}{2}(3f_j^{\text{III}}(\text{H}) + f_j^{\text{III}}(\text{T})) > 0 \text{ and} \\
 \lambda_{n_{III}+i}^{f_{1:n}} & := -\frac{1}{2}(f_j^{\text{III}}(\text{H}) + 3f_j^{\text{III}}(\text{T})) > 0 \\
 & \text{for } j := i - 2n_1 - n_{II} \text{ and if } f_j^{\text{III}} \neq 0, \\
 \lambda_k^{f_{1:n}} & := 0 \text{ for all } k \text{ in } \{1, \dots, n\} \setminus \{i, n_{III} + i\}.
 \end{aligned}$$

- Situation (d): If none of the Situations (a), (b) nor (c) apply, and if there is an  $i$  in  $\{n_1 + 1, \dots, 2n_1\}$  such that

$$(f_{n_1+1}, \dots, f_{i-1}, f_i, f_{i+1}, \dots, f_{2n_1})$$

$$= (g_{n_1+1}^T, \dots, g_{i-1}^T, g_i^H, g_{i+1}^T, \dots, g_{2n_1}^T),$$

or, in other words, such that  $f_i = g_i^H$  and  $(\forall k \in \{n_1 + 1, \dots, 2n_1\} \setminus \{i\}) f_k = g_k^T$ , then let

$$\begin{aligned}
 \lambda_{i-n_1}^{f_{1:n}} & := 1, \\
 \lambda_k^{f_{1:n}} & := 0 \text{ for all } k \text{ in } \{1, \dots, n\} \setminus \{i - n_1\}.
 \end{aligned}$$

- Situation (e1): If  $A \cap \mathcal{L}_{>0} \neq \emptyset$ —so  $n_1 \geq 1$ —and none of the Situations (a), (b), (c) nor (d) apply, then let

$$\lambda_1^{f_{1:n}} := 1 \text{ and } \lambda_{2:n}^{f_{1:n}} := 0.$$

- Situation (e2): If  $A \cap \mathcal{L}_{>0} = \emptyset$ —so  $n_{II} \geq 1$  and  $n_{IV} \geq 1$  because  $(h_1(\text{T}), h_2(\text{H})) > 0$ —and none of the Situations (a), (b), (c) nor (d) apply, then let, with  $i := 2n_1 + 1$ ,

$$\begin{aligned}
 \lambda_i^{f_{1:n}} & := f_1^{\text{II}}(\text{T}) - f_1^{\text{II}}(\text{H}) > 0 \text{ if } f_i = g_i^H, \\
 \lambda_i^{f_{1:n}} & := f_1^{\text{IV}}(\text{H}) - f_1^{\text{IV}}(\text{T}) > 0 \text{ if } f_i = g_i^T, \\
 \lambda_k^{f_{1:n}} & := 0 \text{ or all } k \text{ in } \{1, \dots, n\} \setminus \{i\}.
 \end{aligned}$$

In this way, we have defined coefficients  $\lambda_{1:n}^{f_{1:n}} > 0$  for every  $f_{1:n}$  in  $\times_{k=1}^n A_k$ . It only remains to show, with our choices of  $\lambda_{1:n}^{f_{1:n}} > 0$ , that  $A = \{\sum_{k=1}^n \lambda_k^{f_{1:n}} f_k : f_{1:n} \in \times_{k=1}^n A_k\}$ .

We first prove that  $A \subseteq \{\sum_{k=1}^n \lambda_k^{f_{1:n}} f_k : f_{1:n} \in \times_{k=1}^n A_k\}$ . To show that  $f_j^{\text{II}} \in \{\sum_{k=1}^n \lambda_k^{f_{1:n}} f_k : f_{1:n} \in \times_{k=1}^n A_k\}$  for every  $j$  in  $\{1, \dots, n_{II}\}$ , consider any  $f_{1:n}$  in  $\times_{k=1}^n A_k$  such that  $f_{1:n}$  satisfies the conditions of Situation (a) for  $i := j + 2n_1$ , which is then an element of  $\{2n_1 + 1, \dots, 2n_1 + n_{II}\}$ . Then  $\sum_{k=1}^n \lambda_k^{f_{1:n}} f_k = (f_j^{\text{II}}(\text{T}) - f_j^{\text{II}}(\text{H}))g_i^H = (f_j^{\text{II}}(\text{T}) - f_j^{\text{II}}(\text{H}))(-\mathbb{I}_{\{\text{H}\}} + \frac{f_i^{\text{II}}(\text{T})}{f_i^{\text{II}}(\text{T}) - f_i^{\text{II}}(\text{H})}) = (f_j^{\text{II}}(\text{H}) - f_j^{\text{II}}(\text{T}))\mathbb{I}_{\{\text{H}\}} + f_j^{\text{II}}(\text{T}) = f_j^{\text{II}}$ , so indeed  $f_j^{\text{II}} \in \{\sum_{k=1}^n \lambda_k^{f_{1:n}} f_k : f_{1:n} \in \times_{k=1}^n A_k\}$ .

To show that  $f_j^{\text{IV}} \in \{\sum_{k=1}^n \lambda_k^{f_{1:n}} f_k : f_{1:n} \in \times_{k=1}^n A_k\}$  for every  $j$  in  $\{1, \dots, n_{IV}\}$ , consider any  $f_{1:n}$  in  $\times_{k=1}^n A_k$  such that  $f_{1:n}$  satisfies the conditions of Situation (b) for  $i := j + 2n_1 + n_{II} + 2n_{III}$ , which is then an element of  $\{2n_1 + n_{II} + 2n_{III} + 1, \dots, n\}$ . Then  $\sum_{k=1}^n \lambda_k^{f_{1:n}} f_k = (f_j^{\text{IV}}(\text{H}) - f_j^{\text{IV}}(\text{T}))g_i^T = (f_j^{\text{IV}}(\text{H}) - f_j^{\text{IV}}(\text{T}))(-\mathbb{I}_{\{\text{T}\}} + \frac{f_i^{\text{IV}}(\text{H})}{f_i^{\text{IV}}(\text{H}) - f_i^{\text{IV}}(\text{T})}) = (f_j^{\text{IV}}(\text{T}) - f_j^{\text{IV}}(\text{H}))\mathbb{I}_{\{\text{T}\}} + f_j^{\text{IV}}(\text{H}) = f_j^{\text{IV}}$ , so indeed  $f_j^{\text{IV}} \in \{\sum_{k=1}^n \lambda_k^{f_{1:n}} f_k : f_{1:n} \in \times_{k=1}^n A_k\}$ .

To show that  $f_j^{\text{III}} \in \{\sum_{k=1}^n \lambda_k^{f_{1:n}} f_k : f_{1:n} \in \times_{k=1}^n A_k\}$  for every  $j$  in  $\{1, \dots, n_{III}\}$ , consider any  $f_{1:n}$  in  $\times_{k=1}^n A_k$  such that  $f_{1:n}$  satisfies the conditions of Situation (c) for  $i := j + 2n_1 + n_{II}$ , which is then an element of  $\{2n_1 + n_{II} + 1, \dots, 2n_1 + n_{II} + n_{III}\}$ . Then  $\sum_{k=1}^n \lambda_k^{f_{1:n}} f_k = -\frac{1}{2}(3f_j^{\text{III}}(\text{H}) + f_j^{\text{III}}(\text{T}))g_i^H - \frac{1}{2}(f_j^{\text{III}}(\text{H}) + 3f_j^{\text{III}}(\text{T}))g_i^T = -\frac{1}{2}(3f_j^{\text{III}}(\text{H}) + f_j^{\text{III}}(\text{T}))(-\mathbb{I}_{\{\text{H}\}} + \frac{1}{4}) - \frac{1}{2}(f_j^{\text{III}}(\text{H}) +$

$3f_j^{\text{III}}(\text{T})(-\mathbb{I}_{\{\text{T}\}} + \frac{1}{4}) = f_j^{\text{III}}(\text{H})\mathbb{I}_{\{\text{H}\}} + f_j^{\text{III}}(\text{T})\mathbb{I}_{\{\text{T}\}} = f_j^{\text{III}}$   
 if  $f_j^{\text{III}} \neq 0$ , and  $\sum_{k=1}^n \lambda_k^{f_{1:n}} f_k = g_i^{\text{H}} + g_i^{\text{T}} = -\mathbb{I}_{\{\text{H}\}} + \frac{1}{2} - \mathbb{I}_{\{\text{T}\}} + \frac{1}{2} = 0 = f_j^{\text{III}}$  if  $f_j^{\text{III}} = 0$ , so indeed  $f_j^{\text{III}} \in \{\sum_{k=1}^n \lambda_k^{f_{1:n}} f_k : f_{1:n} \in \times_{k=1}^n A_k\}$ .

To show that  $f_j^{\text{I}} \in \{\sum_{k=1}^n \lambda_k^{f_{1:n}} f_k : f_{1:n} \in \times_{k=1}^n A_k\}$  for every  $j$  in  $\{1, \dots, n_{\text{I}}\}$ , consider any  $f_{1:n}$  in  $\times_{k=1}^n A_k$  such that  $f_{1:n}$  satisfies the conditions of Situation (d) for  $i := j + n_{\text{I}}$ , which is then an element of  $\{n_{\text{I}} + 1, \dots, 2n_{\text{I}}\}$ . Then  $\sum_{k=1}^n \lambda_k^{f_{1:n}} f_k = g_j = f_j^{\text{I}}$ , so indeed  $f_j^{\text{I}} \in \{\sum_{k=1}^n \lambda_k^{f_{1:n}} f_k : f_{1:n} \in \times_{k=1}^n A_k\}$ .

We finally show, conversely, that  $A \supseteq \{\sum_{k=1}^n \lambda_k^{f_{1:n}} f_k : f_{1:n} \in \times_{k=1}^n A_k\}$ . Consider any  $f$  in  $\{\sum_{k=1}^n \lambda_k^{f_{1:n}} f_k : f_{1:n} \in \times_{k=1}^n A_k\}$ . Then  $f = \sum_{k=1}^n \lambda_k^{f_{1:n}} f_k$  for some  $f_{1:n}$  in  $\times_{k=1}^n A_k$ . If this  $f_{1:n}$  satisfies the conditions of Situation (a) for some  $i$  in  $\{2n_{\text{I}} + 1, \dots, 2n_{\text{I}} + n_{\text{II}}\}$ , then  $\sum_{k=1}^n \lambda_k^{f_{1:n}} f_k = f_j^{\text{II}}$  for  $j := i - 2n_{\text{I}}$ , as shown above, so  $f \in A$ . If  $f_{1:n}$  satisfies the conditions of Situation (b) for some  $i$  in  $\{2n_{\text{I}} + n_{\text{II}} + 2n_{\text{III}} + 1, \dots, n\}$ , then  $\sum_{k=1}^n \lambda_k^{f_{1:n}} f_k = f_j^{\text{IV}}$  for  $j := i - 2n_{\text{I}} - n_{\text{II}} - 2n_{\text{III}}$ , as shown above, so  $f \in A$ . If  $f_{1:n}$  satisfies the conditions of Situation (c) for some  $i$  in  $\{2n_{\text{I}} + n_{\text{II}} + 1, \dots, 2n_{\text{I}} + n_{\text{II}} + n_{\text{III}}\}$ , then  $\sum_{k=1}^n \lambda_k^{f_{1:n}} f_k = f_j^{\text{III}}$  for  $j := i - 2n_{\text{I}} - n_{\text{II}}$ , as shown above, so  $f \in A$ . If  $f_{1:n}$  satisfies the conditions of Situation (d) for some  $i$  in  $\{n_{\text{I}} + 1, \dots, 2n_{\text{I}}\}$ , then  $\sum_{k=1}^n \lambda_k^{f_{1:n}} f_k = f_j^{\text{I}}$  for  $j := i - n_{\text{I}}$ , as shown above, so  $f \in A$ . The only other possibility is that  $f_{1:n}$  satisfies the conditions of Situation (e1) or (e2), depending on whether or not  $A \cap \mathcal{L}_{>0} \neq \emptyset$ . If  $A \cap \mathcal{L}_{>0} \neq \emptyset$  (so Situation (e1)), then  $\sum_{k=1}^n \lambda_k^{f_{1:n}} f_k = f_1^{\text{I}}$ , which is an element of  $A$  since  $n_{\text{I}} \geq 1$ , so  $f \in A$ . If  $A \cap \mathcal{L}_{>0} = \emptyset$  (so Situation (e2)), then  $\sum_{k=1}^n \lambda_k^{f_{1:n}} f_k = (f_1^{\text{II}}(\text{T}) - f_1^{\text{II}}(\text{H}))(-\mathbb{I}_{\{\text{H}\}} + \frac{f_1^{\text{II}}(\text{T})}{f_1^{\text{II}}(\text{T}) - f_1^{\text{II}}(\text{H})}) = f_1^{\text{II}}$  or  $\sum_{k=1}^n \lambda_k^{f_{1:n}} f_k = (f_1^{\text{IV}}(\text{H}) - f_1^{\text{IV}}(\text{T}))(-\mathbb{I}_{\{\text{H}\}} + \frac{f_1^{\text{IV}}(\text{H})}{f_1^{\text{IV}}(\text{H}) - f_1^{\text{IV}}(\text{T})}) = f_1^{\text{IV}}$ , which both belong to  $A$  since  $n_{\text{II}} \geq 1$  and  $n_{\text{IV}} \geq 1$ , so  $f \in A$ . There are no other possibilities, so we conclude that indeed  $A \supseteq \{\sum_{k=1}^n \lambda_k^{f_{1:n}} f_k : f_{1:n} \in \times_{k=1}^n A_k\}$ . ■

**Proof** [Proof of Proposition 10] By definition, the least informative coherent set of desirable gamble sets that includes  $\{\{f\} : f \in D\}$  is the natural extension  $\text{cl}_{\overline{\mathbf{K}}}(\mathcal{A}_D)$  of the assessment  $\mathcal{A}_D := \{\{f\} : f \in D\}$ .

Let us first show that  $\mathcal{A}_D$  is consistent. By Theorem 6, we need to show that  $\emptyset \notin \mathcal{A}_D$  and  $\{0\} \notin \text{Posi}(\mathcal{L}_{>0}^S \cup \mathcal{A}_D) = \text{Posi}(\mathcal{A}_D)$ , where the equality follows from the fact that  $\mathcal{L}_{>0}^S \subseteq \mathcal{A}_D$  by Axiom D<sub>2</sub>. By definition,  $\emptyset \notin \mathcal{A}_D$ , so it remains to prove that  $\{0\} \notin \text{Posi}(\mathcal{A}_D)$ . To this end, consider any singleton  $\{g\}$  in  $\text{Posi}(\mathcal{A}_D)$ . There are  $n$  in  $\mathbb{N}$ ,  $A_1, \dots, A_n$  in  $\mathcal{A}_D$ , and, for all  $f_{1:n}$  in  $\times_{k=1}^n A_k$ , coefficients  $\lambda_{1:n}^{f_{1:n}} > 0$ , such that  $\{\sum_{k=1}^n \lambda_k^{f_{1:n}} f_k : f_{1:n} \in \times_{k=1}^n A_k\} = \{g\}$ . Since the entries of any sequence  $f_{1:n}$  in  $\times_{k=1}^n A_k$  belong to  $\mathcal{L}_{>0} \cup D$ , so does  $\sum_{k=1}^n \lambda_k^{f_{1:n}} f_k$ , by repeated application of Axiom D<sub>3</sub>.

So  $g \in D \cup \mathcal{L}_{>0}$ . By Axiom D<sub>1</sub>,  $0 \notin D$ , whence indeed  $g \neq 0$ .

We now know that  $\mathcal{A}_D$  is consistent, so by Theorem 6, its natural extension  $\mathcal{A}_D$  is equal to  $\text{Rs}(\text{Posi}(\mathcal{A}_D))$ , since we already know that  $\mathcal{L}_{>0}^S \subseteq \mathcal{A}_D$ . Let us show that  $K_D = \text{Rs}(\text{Posi}(\mathcal{A}_D))$ ; we prove (i)  $K_D \subseteq \text{Rs}(\text{Posi}(\mathcal{A}_D))$  and (ii)  $K_D \supseteq \text{Rs}(\text{Posi}(\mathcal{A}_D))$ . For (i), consider any  $A$  in  $K_D$ , so  $A \cap D \neq \emptyset$ , and therefore  $f \in A$  for some  $f$  in  $D$ . This tells us that  $\{f\} \in \mathcal{A}_D$ . Since  $K \subseteq \text{Posi}(K)$  for any  $K$  in  $\mathbf{K}$ , we find that  $\{f\} \in \text{Posi}(\mathcal{A}_D)$ . Therefore, any superset of  $\{f\}$ —and in particular indeed the set  $A$ —will belong to  $\text{Rs}(\text{Posi}(\mathcal{A}_D))$ .

Let us now show that (ii)  $K_D \supseteq \text{Rs}(\text{Posi}(\mathcal{A}_D))$ . To this end, consider any  $A$  in  $\text{Rs}(\text{Posi}(\mathcal{A}_D))$ . Then, by the definition of the Rs operator, there is some  $B$  in  $\text{Posi}(\mathcal{A}_D)$  such that  $B \setminus \mathcal{L}_{\leq 0} \subseteq A$ . This means that there are  $n$  in  $\mathbb{N}$ ,  $A_1, \dots, A_n$  in  $\mathcal{L}_{>0}^S \cup \mathcal{A}_D$ , and, for all  $f_{1:n}$  in  $\times_{k=1}^n A_k$ , coefficients  $\lambda_{1:n}^{f_{1:n}} > 0$ , such that  $\{\sum_{k=1}^n \lambda_k^{f_{1:n}} f_k : f_{1:n} \in \times_{k=1}^n A_k\} = B$ . Since the entries of any sequence  $f_{1:n}$  in  $\times_{k=1}^n A_k$  belong to  $\mathcal{L}_{>0} \cup D$ , so does  $\sum_{k=1}^n \lambda_k^{f_{1:n}} f_k$ , by repeated application of Axiom D<sub>3</sub>. So we find  $B \subseteq D \cup \mathcal{L}_{>0} = D$ , where the equality is a consequence of Axiom D<sub>2</sub>, and hence  $B \setminus \mathcal{L}_{\leq 0} \subseteq D$ . So  $A \cap D \neq \emptyset$ , and therefore indeed  $A \in K_D$ .

We finish the proof by showing that  $K_D$  is indeed compatible with  $D$ , or, in other words, that  $D_{K_D} = D$ . Indeed, infer that  $D_{K_D} = \{f \in \mathcal{L} : \{f\} \in K_D\} = \{f \in \mathcal{L} : \{f\} \cap D \neq \emptyset\} = D$ . ■

**Proof** [Proof of Proposition 14] For Axiom K<sub>0</sub>, consider any  $A$  in  $K \setminus E$ . Then  $\mathbb{I}_E A \in K$ , whence  $\mathbb{I}_E A \neq \emptyset$  since  $K$  satisfies Axiom K<sub>0</sub>. Therefore indeed  $A \neq \emptyset$ .

For Axiom K<sub>1</sub>, consider any  $A$  in  $K \setminus E$ . Then  $\mathbb{I}_E A \in K$ , whence  $\mathbb{I}_E A \setminus \{0\} \in K$  since  $K$  satisfies Axiom K<sub>1</sub>. Since  $\mathbb{I}_E f \neq 0 \Leftrightarrow f \neq 0$  for any gamble  $f$  on  $E$ , we find that  $\mathbb{I}_E(A \setminus \{0\}) \in K$ , whence indeed  $A \setminus \{0\} \in K \setminus E$ .

For Axiom K<sub>2</sub>, consider any  $f$  in  $\mathcal{L}(E)_{>0}$ . Then  $\mathbb{I}_E f \in \mathcal{L}(\mathcal{X})_{>0}$ , whence by Axiom K<sub>2</sub>  $\{\mathbb{I}_E f\} \in K$ . Therefore indeed  $\{f\} \in K \setminus E$ .

For Axiom K<sub>3</sub>, consider any  $A_1$  and  $A_2$  in  $K \setminus E$ , and, for any  $f$  in  $A_1$  and  $g$  in  $A_2$ , any  $(\lambda_{f,g}, \mu_{f,g}) > 0$ . Then  $\mathbb{I}_E A_1 \in K$  and  $\mathbb{I}_E A_2 \in K$ , whence by Axiom K<sub>3</sub>  $\{\lambda_{f,g} f + \mu_{f,g} g : f \in \mathbb{I}_E A_1, g \in \mathbb{I}_E A_2\} = \{\lambda_{f,g} \mathbb{I}_E f + \mu_{f,g} \mathbb{I}_E g : f \in A_1, g \in A_2\} = \mathbb{I}_E \{\lambda_{f,g} f + \mu_{f,g} g : f \in A_1, g \in A_2\} \in K$ , where we identified  $(\lambda_{\mathbb{I}_E f, \mathbb{I}_E g}, \mu_{\mathbb{I}_E f, \mathbb{I}_E g})$  with  $(\lambda_{f,g}, \mu_{f,g})$ , for any  $f$  in  $A_1$  and  $g$  in  $A_2$ . Therefore indeed  $\{\lambda_{f,g} f + \mu_{f,g} g : f \in A_1, g \in A_2\} \in K \setminus E$ .

For Axiom K<sub>4</sub>, consider any  $A_1$  in  $K \setminus E$  and any  $A_2$  in  $\mathcal{Q}$  such that  $A_1 \subseteq A_2$ . Then  $\mathbb{I}_E A_1 \in K$  and  $\mathbb{I}_E A_1 \subseteq \mathbb{I}_E A_2$ , whence by Axiom K<sub>4</sub>  $\mathbb{I}_E A_2 \in K$ . Therefore indeed  $A_2 \in R \setminus E$ . ■

**Proof** [Proof of Proposition 15] For the first statement, consider any  $f$  in  $\mathcal{L}(E)$ , and infer the following chain of

equivalences:

$$\begin{aligned} f \in D_K \rfloor E &\Leftrightarrow \mathbb{I}_E f \in D_K \Leftrightarrow \{\mathbb{I}_E f\} \in K \\ &\Leftrightarrow \{f\} \in K \rfloor E \Leftrightarrow f \in D_{K \rfloor E}, \end{aligned}$$

where the first equivalence follows from Definition 12, the second one and the last one are due to Equation (3), and the third one follows from Definition 13.

For the second statement, consider any  $A$  in  $\mathcal{Q}(\mathcal{L}(E))$  and the following chain of equivalences:

$$\begin{aligned} A \in K_D \rfloor E &\Leftrightarrow \mathbb{I}_E A \in K_D \Leftrightarrow \mathbb{I}_E A \cap D \neq \emptyset \\ &\Leftrightarrow (\exists f \in A) \mathbb{I}_E f \in D \\ &\Leftrightarrow A \cap D \rfloor E \neq \emptyset \Leftrightarrow A \in K_{D \rfloor E}, \end{aligned}$$

where the first equivalence follows from Definition 13, the second one and the last one are due to Proposition 10, and the fourth one follows from Definition 12.

We now turn to the last statement. By Theorem 11 we have that  $K = \bigcap \{K_D : D \in \overline{\mathbf{D}}(K)\}$ , implying that  $A \in K \Leftrightarrow (\forall D \in \overline{\mathbf{D}}(K)) A \in K_D$ , for any  $A$  in  $\mathcal{Q}(\mathcal{L}(E))$ . Therefore in particular, for any  $A$  in  $\mathcal{Q}(\mathcal{L}(E))$ ,

$$\begin{aligned} A \in K \rfloor E &\Leftrightarrow \mathbb{I}_E A \in K \Leftrightarrow (\forall D \in \overline{\mathbf{D}}(K)) \mathbb{I}_E A \in K_D \\ &\Leftrightarrow (\forall D \in \overline{\mathbf{D}}(K)) A \in K_{D \rfloor E} \\ &\Leftrightarrow (\forall D \in \overline{\mathbf{D}}(K)) A \in K_{D \rfloor E} \\ &\Leftrightarrow A \in \bigcap \{K_{D \rfloor E} : D \in \overline{\mathbf{D}}(K)\}, \end{aligned}$$

where the first and third equivalences follow from Definition 13, and the fourth one follows from the already established second statement of this proposition. Therefore indeed  $K \rfloor E = \bigcap \{K_{D \rfloor E} : D \in \overline{\mathbf{D}}(K)\}$ . ■

**Proof** [Proof of Proposition 19] The result follows immediately, once we realise that  $A_1 \neq \emptyset \Leftrightarrow A_1^* \neq \emptyset$ ,  $f > 0 \Leftrightarrow f^* > 0$ ,  $\lambda f + \mu g \in A_1 \Leftrightarrow \lambda f^* + \mu g^* \in A_1^*$ , and  $A_1 \subseteq A_2 \Leftrightarrow A_1^* \subseteq A_2^*$ , for all  $f$  in  $\mathcal{L}(\mathcal{X}_0)$  whose cylindrical extension is  $f^*$ , all  $A_1$  and  $A_2$  in  $\mathcal{Q}(\mathcal{L}(\mathcal{X}_0))$  whose cylindrical extensions are  $A_1^*$  and  $A_2^*$ , and all  $\lambda$  in  $\mu$  in  $\mathbb{R}$  such that  $(\lambda, \mu) > 0$ . ■

**Proof** [Proof of Proposition 20] For the first statement, observe that indeed

$$\begin{aligned} \text{marg}_O D_K &= \{f \in \mathcal{L}(\mathcal{X}_0) : f \in D_K\} \\ &= \{f \in \mathcal{L}(\mathcal{X}_0) : \{f\} \in K\} \\ &= \{f \in \mathcal{L}(\mathcal{X}_0) : \{f\} \in \text{marg}_O K\} = D_{\text{marg}_O K}, \end{aligned}$$

where the second and last equalities follow from Equation (3), and the third one follows from Definition 18.

For the second statement, observe that

$$\begin{aligned} \text{marg}_O K_D &= \{A \in \mathcal{Q}(\mathcal{L}(\mathcal{X}_0)) : A \in K_D\} \\ &= \{A \in \mathcal{Q}(\mathcal{L}(\mathcal{X}_0)) : A \cap D \neq \emptyset\} \end{aligned}$$

$$\begin{aligned} &= \{A \in \mathcal{Q}(\mathcal{L}(\mathcal{X}_0)) : A \cap \text{marg}_O D \neq \emptyset\} \\ &= \{A \in \mathcal{Q}(\mathcal{L}(\mathcal{X}_0)) : A \in K_{\text{marg}_O D}\} = K_{\text{marg}_O D}, \end{aligned}$$

where the first equality follows from Definition 18 and the second and penultimate equalities follow from Proposition 10.

We now turn to the last statement. By Theorem 11 we have that  $K = \bigcap \{K_D : D \in \overline{\mathbf{D}}(K)\}$ , implying that  $A \in K \Leftrightarrow (\forall D \in \overline{\mathbf{D}}(K)) A \in K_D$ , for any  $A$  in  $\mathcal{Q}(\mathcal{L}(\mathcal{X}_{1:n}))$ . Therefore in particular, for any  $A$  in  $\mathcal{Q}(\mathcal{L}(\mathcal{X}_0))$ ,

$$\begin{aligned} A \in \text{marg}_O K &\Leftrightarrow A \in K \Leftrightarrow (\forall D \in \overline{\mathbf{D}}(K)) A \in K_D \\ &\Leftrightarrow (\forall D \in \overline{\mathbf{D}}(K)) A \in \text{marg}_O K_D \\ &\Leftrightarrow (\forall D \in \overline{\mathbf{D}}(K)) A \in K_{\text{marg}_O D} \\ &\Leftrightarrow A \in \bigcap \{K_{\text{marg}_O D} : D \in \overline{\mathbf{D}}(K)\}, \end{aligned}$$

where the first and third equivalences follow from Definition 18, and the fourth one follows from the already established second statement of this proposition. Therefore indeed  $\text{marg}_O K = \bigcap \{K_{\text{marg}_O D} : D \in \overline{\mathbf{D}}(K)\}$ . ■

**Proof** [Proof of Proposition 21] We will first show that any coherent set of desirable gamble sets  $K'$  on  $\mathcal{L}(\mathcal{X}_{1:n})$  that marginalises to  $K_O$  must be at least as informative as  $\text{ext}_{1:n}(K_O)$ . To establish this, since  $K'$  marginalises to  $K_O$ , note that  $A \in K_O \Leftrightarrow A \in K'$ , for all  $A$  in  $\mathcal{Q}(\mathcal{L}(\mathcal{X}_0))$ . Therefore, in particular,  $A \in K_O \Rightarrow A \in K'$  for all  $A$  in  $\mathcal{Q}(\mathcal{L}(\mathcal{X}_0))$ , so  $K_O \subseteq K'$ . This implies that indeed  $\text{ext}_{1:n}(K_O) = \text{Rs}(\text{Posi}(\mathcal{L}^s(\mathcal{X}_{1:n})_{>0} \cup K_O)) \subseteq \text{Rs}(\text{Posi}(\mathcal{L}^s(\mathcal{X}_{1:n})_{>0} \cup K')) = K'$ , where the final equality holds because  $K'$  is coherent.

So we already know that any coherent set of desirable gamble sets that marginalises to  $K_O$  must be at least as informative as  $\text{ext}_{1:n}(K_O)$ . It therefore suffices to prove that  $\text{ext}_{1:n}(K_O)$  is coherent and that it marginalises to  $K_O$ . To show that  $\text{ext}_{1:n}(K_O) = \text{Rs}(\text{Posi}(\mathcal{L}^s(\mathcal{X}_{1:n})_{>0} \cup \mathcal{A}_{K_O}^{1:n}))$  is coherent, by Theorem 6 it suffices to show that  $K_O$  is a consistent assessment—that is, to show that  $\emptyset \notin \mathcal{A}_{K_O}^{1:n}$  and  $\{0\} \notin \text{Posi}(\mathcal{L}^s(\mathcal{X}_{1:n})_{>0} \cup \mathcal{A}_{K_O}^{1:n})$ . That this is indeed the case follows from the coherence of  $K_O = \mathcal{A}_{K_O}^{1:n}$ .

The proof is therefore complete if we can show that  $\text{marg}_O(\text{ext}_{1:n}(K_O)) = K_O$ . Since for any  $A$  in  $K_O$  it is obvious that both  $A \in \text{ext}_{1:n}(K_O)$  and  $A \in \mathcal{Q}(\mathcal{L}(\mathcal{X}_0))$ , we see immediately that  $K_O \subseteq \text{marg}_O(\text{ext}_{1:n}(K_O))$ , so we concentrate on proving the converse inclusion. Consider any  $A$  in  $\text{marg}_O(\text{ext}_{1:n}(K_O))$ , meaning that both  $A \in \mathcal{Q}(\mathcal{L}(\mathcal{X}_0))$  and  $A \in \text{ext}_{1:n}(K_O)$ . That  $A \in \text{ext}_{1:n}(K_O)$  implies that  $B \setminus \mathcal{L}_{\leq 0} \subseteq A$  for some  $B$  in  $\text{Posi}(\mathcal{L}_{>0}^s \cup K_O)$ . Then there are  $m$  in  $\mathbb{N}$ ,  $A_1, \dots, A_m$  in  $\mathcal{L}_{>0}^s \cup K_O$ , and coefficients  $\lambda_{1:m}^{f_{1:m}} > 0$  for all  $f_{1:m}$  in  $\times_{k=1}^m A_k$  such that  $B = \left\{ \sum_{k=1}^m \lambda_k^{f_{1:m}} f_k : f_{1:m} \in \times_{k=1}^m A_k \right\}$ . Without loss of generality, assume that  $A_1, \dots, A_\ell \in K_O$  and  $A_{\ell+1}, \dots, A_m \in \mathcal{L}_{>0}^s$  for some  $\ell$  in  $\{0, \dots, m\}$ . Consider the special subset  $P :=$

$\{f_{1:m} \in \times_{k=1}^m A_k : \lambda_{1:\ell}^{f_{1:m}} = 0\}$  of  $\times_{k=1}^m A_k$ . If  $P \neq \emptyset$ , then for every element  $g_{1:m}$  of  $P$  we have that  $\sum_{k=1}^m \lambda_k^{g_{1:m}} g_k > 0$ , so  $B \cap \mathcal{L}_{>0} \neq \emptyset$ . Since  $B \setminus \mathcal{L}_{\leq 0} \subseteq A$ , also  $A \cap \mathcal{L}_{>0}(\mathcal{X}_O) \neq \emptyset$ , whence  $A \in K_O$  by coherence [more specifically, by Axioms  $K_2$  and  $K_4$ ]. Therefore, assume that  $P = \emptyset$ , and define the coefficients

$$\mu_k^{f_{1:m}} := \begin{cases} \lambda_k^{f_{1:m}} & \text{if } k \leq \ell \\ 0 & \text{if } k \geq \ell + 1 \end{cases}$$

for all  $f_{1:m}$  in  $\times_{k=1}^m A_k$  and  $k$  in  $\{1, \dots, m\}$ . Because  $P = \emptyset$ , for every  $f_{1:m}$  in  $\times_{k=1}^m A_k$  we have that  $\mu_{1:\ell}^{f_{1:m}} = \lambda_{1:\ell}^{f_{1:m}} > 0$ . Also, for every  $f_{1:m}$  in  $\times_{k=1}^m A_k$  and  $k \geq \ell + 1$ , the coefficient  $\mu_k^{f_{1:m}}$  equals 0, so we identify  $\mu_{1:\ell}^{f_{1:m}}$  with  $\mu_{1:\ell}^{f_{1:m}}$ . Then every element of  $\left\{ \sum_{k=1}^m \mu_k^{f_{1:m}} f_k : f_{1:m} \in \times_{k=1}^m A_k \right\} = \left\{ \sum_{k=1}^{\ell} \mu_k^{f_{1:m}} f_k : f_{1:\ell} \in \times_{k=1}^{\ell} A_k \right\} \in \text{Posi}(K_O) = K_O$  is dominated by an element of  $B$ . Therefore, by Lemma 27 below  $B \in K_O$ , whence by coherence, indeed also  $A \in K_O$ . ■

**Lemma 27** Consider any coherent set of desirable gamble sets  $K$  and any gamble sets  $A$  and  $B$  in  $\mathcal{Q}$ . If  $A \in K$  and  $(\forall f \in A)(\exists g \in B)f \leq g$ , then  $B \in K$ .

**Proof** Let  $A := \{f_1, \dots, f_m\}$  for some  $m$  in  $\mathbb{N}$ , and denote the finite possibility space  $\mathcal{X} = \{x_1, \dots, x_\ell\}$  for some  $\ell$  in  $\mathbb{N}$ . Since  $(\forall f \in A)(\exists g \in B)f \leq g$ , we have that  $B$  is a superset of

$$\begin{aligned} B' &:= \left\{ f_1 + \sum_{k=1}^{\ell} \mu_{k,1} \mathbb{I}_{\{x_k\}}, \dots, f_m + \sum_{k=1}^{\ell} \mu_{k,m} \mathbb{I}_{\{x_k\}} \right\} \\ &= \left\{ f_j + \sum_{k=1}^{\ell} \mu_{k,j} \mathbb{I}_{\{x_k\}} : j \in \{1, \dots, m\} \right\} \end{aligned}$$

for some  $\mu_{k,j} \geq 0$  for all  $k$  in  $\{1, \dots, \ell\}$  and  $j$  in  $\{1, \dots, m\}$ . Use the definition of the Posi operator, with  $A_1 := \{\mathbb{I}_{\{x_1\}}\} \in K$ ,  $\dots$ ,  $A_\ell := \{\mathbb{I}_{\{x_\ell\}}\} \in K$ ,  $A_{\ell+1} := A \in K$ , and for all  $f_{1:\ell+1}^j := (\mathbb{I}_{\{x_1\}}, \mathbb{I}_{\{x_2\}}, \dots, \mathbb{I}_{\{x_\ell\}}, f_j) \in \times_{k=1}^{\ell+1} A_k$ , let  $\lambda_{1:\ell+1}^{f_{1:\ell+1}^j} := (\mu_{1,j}, \mu_{2,j}, \dots, \mu_{\ell,j}, 1) > 0$ , to infer that

$$\begin{aligned} &\left\{ \sum_{k=1}^{\ell+1} \lambda_k^{f_{1:\ell+1}^j} f_k^j : f_{1:\ell+1}^j \in \times_{k=1}^{\ell+1} A_k \right\} \\ &= \left\{ f_j + \sum_{k=1}^{\ell} \mu_{k,j} \mathbb{I}_{\{x_k\}} : j \in \{1, \dots, m\} \right\} = B' \end{aligned}$$

belongs to  $\text{Posi}(K)$ . Because  $B \supseteq B'$ , we have that  $B \in \text{Rs}(\text{Posi}(K))$ . But since  $K = \text{Rs}(\text{Posi}(K))$  by coherence, we infer that indeed  $B \in K$ . ■

**Proof** [Proof of Proposition 22] By Theorem 11 we have that  $K_O = \bigcap \{K_{D_O} : D_O \in \overline{\mathbf{D}}(K_O)\}$ , implying that  $A \in$

$K_O \Leftrightarrow (\forall D_O \in \overline{\mathbf{D}}(K_O)) A \in K_{D_O}$ , for any  $A$  in  $\mathcal{Q}(\mathcal{L}(\mathcal{X}_O))$ . Therefore, for any  $A$  in  $\mathcal{Q}(\mathcal{L}(\mathcal{X}_O))$ ,

$$\begin{aligned} A \in \text{ext}_{1:n}(K_O) &\Leftrightarrow A \in K_O \\ &\Leftrightarrow (\forall D_O \in \overline{\mathbf{D}}(K_O)) A \in K_{D_O} \\ &\Leftrightarrow (\forall D_O \in \overline{\mathbf{D}}(K_O)) A \cap D_O \neq \emptyset \\ &\Leftrightarrow (\forall D_O \in \overline{\mathbf{D}}(K_O)) A \cap \text{ext}_{1:n}^{\mathbf{D}}(D_O) \neq \emptyset \\ &\Leftrightarrow A \in \bigcap \{K_{\text{ext}_{1:n}^{\mathbf{D}}(D_O)} : D_O \in \overline{\mathbf{D}}(K_O)\}, \end{aligned}$$

where the first equivalence holds because  $\text{ext}_{1:n}(K_O)$  marginalises to  $K_O$ , the third one because of Proposition 10, and the fourth one because  $\text{ext}_{1:n}^{\mathbf{D}}(D_O)$  marginalises to  $D_O$ . So indeed  $\text{ext}_{1:n}(K_O) = \bigcap \{K_{\text{ext}_{1:n}^{\mathbf{D}}(D_O)} : D_O \in \overline{\mathbf{D}}(K_O)\}$ . ■

**Proof** [Proof of Proposition 23] Consider the following chain of equalities:

$$\begin{aligned} \text{marg}_O(K_n \upharpoonright E_I) &= \{A \in \mathcal{Q}(\mathcal{L}(\mathcal{X}_O)) : A \in K_n \upharpoonright E_I\} \\ &= \{A \in \mathcal{Q}(\mathcal{L}(\mathcal{X}_O)) : \mathbb{I}_{E_I} A \in K_n\} \\ &= \{A \in \mathcal{Q}(\mathcal{L}(\mathcal{X}_O)) : \mathbb{I}_{E_I} A \in \text{marg}_{I \cup O} K_n\} \\ &= \{A \in \mathcal{Q}(\mathcal{L}(\mathcal{X}_O)) : A \in (\text{marg}_{I \cup O} K_n) \upharpoonright E_I\} \\ &= \text{marg}_O((\text{marg}_{I \cup O} K_n) \upharpoonright E_I), \end{aligned}$$

where the third equality holds because  $\mathbb{I}_{E_I} A$  is a set of gambles on  $\mathcal{X}_{I \cup O}$ . ■

**Proof** [Proof of Proposition 25] To show that (i) implies (ii), consider any  $A$  in  $\mathcal{Q}(\mathcal{L}(\mathcal{X}_O))$  and  $E_I$  in  $\mathcal{P}_{\emptyset}(\mathcal{X}_I)$ , and recall the following equivalences:

$$\begin{aligned} A \in K_n &\Leftrightarrow A \in \text{marg}_O(K_n \upharpoonright E_I) \quad \text{by Definition 18 and (i)} \\ &\Leftrightarrow A \in K_n \upharpoonright E_I \quad \text{by Definition 18} \\ &\Leftrightarrow \mathbb{I}_{E_I} A \in K_n \quad \text{by Definition 13.} \end{aligned}$$

To show that (ii) implies (i), consider any  $E_I$  in  $\mathcal{P}_{\emptyset}(\mathcal{X}_I)$ , and recall the following equalities:

$$\begin{aligned} \text{marg}_O(K_n \upharpoonright E_I) &= \{A \in \mathcal{Q}(\mathcal{L}(\mathcal{X}_O)) : A \in K_n \upharpoonright E_I\} \\ &= \{A \in \mathcal{Q}(\mathcal{L}(\mathcal{X}_O)) : \mathbb{I}_{E_I} A \in K_n\} \\ &= \{A \in \mathcal{Q}(\mathcal{L}(\mathcal{X}_O)) : A \in K_n\} \\ &= \text{marg}_O K_n, \end{aligned}$$

where the first and last equalities follow from Definition 18, the second one from Definition 13, and the third one from (ii). ■

**Proof** [Proof of Theorem 26] We will first show that any coherent set of desirable gamble sets  $K'$  on  $\mathcal{L}(\mathcal{X}_{1:n})$  that marginalises to  $K_O$  and that satisfies epistemic irrelevance of  $X_I$  to  $X_O$  must be at least as informative as  $\text{ext}_{1:n}^{\text{irr}}(K_O)$ . To this end, consider any  $B$  in  $\mathcal{A}_{I \rightarrow O}^{\text{irr}}$ .

Then  $B = \mathbb{I}_{E_I}A$  for some  $E_I$  in  $\mathcal{P}_{\emptyset}(\mathcal{X}_I)$  and  $A$  in  $K_O$ . Since  $K'$  marginalises to  $K_O$ , infer that  $A \in K'$ . Furthermore, since  $K'$  satisfies epistemic irrelevance of  $X_I$  to  $X_O$ , by Proposition 25 also  $B = \mathbb{I}_{E_I}A \in K'$ . We conclude that  $B \in \mathcal{A}_{I \rightarrow O}^{\text{irr}} \Rightarrow B \in K' \Leftrightarrow B \in \text{marg}_{I \cup O} K'$ , for every  $B$  in  $\mathcal{Q}(\mathcal{L}(\mathcal{X}_{I \cup O}))$ , so  $\mathcal{A}_{I \rightarrow O}^{\text{irr}} \subseteq \text{marg}_{I \cup O} K'$ . This implies that  $\text{Rs}(\text{Posi}(\mathcal{L}^s(\mathcal{X}_{I \cup O})_{>0} \cup \mathcal{A}_{I \rightarrow O}^{\text{irr}})) \subseteq \text{Rs}(\text{Posi}(\text{marg}_{I \cup O} K')) = \text{marg}_{I \cup O} K'$ , where the equality follows from the fact that  $\text{marg}_{I \cup O} K'$  is coherent by Proposition 19. Then  $\text{ext}_{1:n}^{\text{irr}}(K_O) = \text{ext}_{1:n}(\text{Rs}(\text{Posi}(\mathcal{L}^s(\mathcal{X}_{I \cup O})_{>0} \cup \mathcal{A}_{I \rightarrow O}^{\text{irr}}))) \subseteq \text{ext}_{1:n}(\text{marg}_{I \cup O} K')$  and since by Proposition 21  $\text{ext}_{1:n}(\text{marg}_{I \cup O} K')$  is the least informative coherent set of desirable gamble sets on  $\mathcal{L}(\mathcal{X}_{1:n})$  that marginalises to  $\text{marg}_{I \cup O} K'$ , we have that  $\text{ext}_{1:n}(\text{Rs}(\text{Posi}(\text{marg}_{I \cup O} K')) \subseteq K'$ . Therefore indeed  $\text{ext}_{1:n}^{\text{irr}}(K_O) \subseteq K'$ .

The proof of the first statement is therefore complete if we could show that  $\text{ext}_{1:n}^{\text{irr}}(K_O)$  (i) is coherent, (ii) marginalises to  $K_O$ , and (iii) satisfies epistemic irrelevance of  $X_I$  to  $X_O$ .

For (i), it suffices to show that  $\emptyset \notin \mathcal{A}_{I \rightarrow O}^{\text{irr}}$  and  $\{0\} \notin K_{I \cup O}^{\text{irr}} = \text{Rs}(\text{Posi}(\mathcal{L}^s(\mathcal{X}_{I \cup O})_{>0} \cup \mathcal{A}_{I \rightarrow O}^{\text{irr}}))$ .<sup>6</sup> indeed, if this is the case, then by Theorem 6  $K_{I \cup O}^{\text{irr}}$  is a coherent set of desirable gamble sets on  $\mathcal{L}(\mathcal{X}_{I \cup O})$ , and then by Proposition 21  $\text{ext}_{1:n}^{\text{irr}}(K_O)$  is a coherent set of desirable gamble sets on  $\mathcal{L}(\mathcal{X}_{1:n})$ . So we will show that  $\emptyset \notin \mathcal{A}_{I \rightarrow O}^{\text{irr}}$  and  $\{0\} \notin K_{I \cup O}^{\text{irr}}$ . That  $\emptyset \notin \mathcal{A}_{I \rightarrow O}^{\text{irr}}$  is clear from Equation (6) because  $K_O$  is coherent. So we focus on proving that  $\{0\} \notin K_{I \cup O}^{\text{irr}}$ . Assume *ex absurdo* that  $\{0\} \in K_{I \cup O}^{\text{irr}}$ . By Lemma 28 below we would then infer that  $\{\sum_{x_I \in \mathcal{X}_I} h(x_I, \cdot) : h \in \{0\}\} = \{0\} \in K_O$ , contradicting the coherence of  $K_O$ . Therefore indeed  $\{0\} \notin K_{I \cup O}^{\text{irr}}$ .

For (ii), we need to show that  $A \in \text{ext}_{1:n}^{\text{irr}}(K_O) \Leftrightarrow A \in K_O$  for any  $A$  in  $\mathcal{Q}(\mathcal{L}(\mathcal{X}_O))$ . For necessity, consider any  $A$  in  $\mathcal{Q}(\mathcal{L}(\mathcal{X}_O))$  and assume that  $A \in \text{ext}_{1:n}^{\text{irr}}(K_O)$ . By Lemma 28 then  $\{\sum_{x_I \in \mathcal{X}_I} h(x_I, \cdot) : h \in A\} \in K_O$ . Since  $A$  is a set of gambles on  $\mathcal{X}_O$ , we infer  $\{\sum_{x_I \in \mathcal{X}_I} h(x_I, \cdot) : h \in A\} = \{\sum_{x_I \in \mathcal{X}_I} h : h \in A\} = \{|\mathcal{X}_I|h : h \in A\} = |\mathcal{X}_I|A$ , whence by coherence, indeed  $A \in K_O$ . For sufficiency, consider any  $A$  in  $\mathcal{Q}(\mathcal{L}(\mathcal{X}_O))$  and assume that  $A \in K_O$ . Then  $A = \mathbb{I}_{\mathcal{X}_I}A$  and  $\mathcal{X}_I \in \mathcal{P}_{\emptyset}(\mathcal{X}_I)$ , so  $A \in \mathcal{A}_{I \rightarrow O}^{\text{irr}}$ . Therefore indeed  $A \in \text{ext}_{1:n}^{\text{irr}}(K_O)$ .

For (iii), by Proposition 25 it suffices to show that  $A \in \text{ext}_{1:n}^{\text{irr}}(K_O) \Leftrightarrow \mathbb{I}_{E_I}A \in \text{ext}_{1:n}^{\text{irr}}(K_O)$ , for all  $A$  in  $\mathcal{Q}(\mathcal{L}(\mathcal{X}_O))$  and  $E_I$  in  $\mathcal{P}_{\emptyset}(\mathcal{X}_I)$ . For necessity, consider any  $A$  in  $\mathcal{Q}(\mathcal{L}(\mathcal{X}_O))$  and any  $E_I$  in  $\mathcal{P}_{\emptyset}(\mathcal{X}_I)$ , and assume that  $A \in \text{ext}_{1:n}^{\text{irr}}(K_O)$ . Since we just have shown that  $\text{marg}_O \text{ext}_{1:n}^{\text{irr}}(K_O) = K_O$ , this implies that  $A \in K_O$ , whence indeed  $\mathbb{I}_{E_I}A \in \mathcal{A}_{I \rightarrow O}^{\text{irr}} \subseteq \text{ext}_{1:n}^{\text{irr}}(K_O)$ . For sufficiency, con-

sider any  $A$  in  $\mathcal{Q}(\mathcal{L}(\mathcal{X}_O))$  and any  $E_I$  in  $\mathcal{P}_{\emptyset}(\mathcal{X}_I)$ , and assume that  $\mathbb{I}_{E_I}A \in \text{ext}_{1:n}^{\text{irr}}(K_O)$ . Since by Proposition 21  $\text{ext}_{1:n}^{\text{irr}}(K_O)$  marginalises to  $K_{I \cup O}^{\text{irr}}$ , this implies that  $\mathbb{I}_{E_I}A \in K_{I \cup O}^{\text{irr}}$ . Use Lemma 28 to infer that then  $\{\sum_{x_I \in \mathcal{X}_I} h(x_I, \cdot) : h \in \mathbb{I}_{E_I}A\} = \{\sum_{x_I \in \mathcal{X}_I} \mathbb{I}_{E_I}h(x_I, \cdot) : h \in A\} = \{|\mathbb{I}_{E_I}|h : h \in A\} = |\mathbb{I}_{E_I}|A \in K_O$ , whence by coherence indeed  $A \in K_O$ .

The second statement is a direct application of Proposition 22.  $\blacksquare$

**Lemma 28** Consider any disjoint and non-empty subsets  $I$  and  $O$  of  $\{1, \dots, n\}$ , and any coherent set of desirable gamble sets  $K_O$  on  $\mathcal{L}(\mathcal{X}_O)$ . Then

$$A \in \text{Rs}(\text{Posi}(\mathcal{L}^s(\mathcal{X}_{I \cup O})_{>0} \cup \mathcal{A}_{I \rightarrow O}^{\text{irr}})) \Rightarrow \left\{ \sum_{x_I \in \mathcal{X}_I} h(x_I, \cdot) : h \in A \right\} \in K_O,$$

for all  $A$  in  $\mathcal{Q}(\mathcal{L}(\mathcal{X}_{I \cup O}))$ .

**Proof** Consider any  $A$  in  $\mathcal{Q}(\mathcal{L}(\mathcal{X}_{I \cup O}))$  and assume that  $A \in \text{Rs}(\text{Posi}(\mathcal{L}^s(\mathcal{X}_{I \cup O})_{>0} \cup \mathcal{A}_{I \rightarrow O}^{\text{irr}}))$ . Then  $B \setminus \mathcal{L}_{\leq 0} \subseteq A$  for some  $B$  in  $\text{Posi}(\mathcal{L}^s(\mathcal{X}_{I \cup O})_{>0} \cup \mathcal{A}_{I \rightarrow O}^{\text{irr}})$ , implying that  $B = \{\sum_{k=1}^m \lambda_k^{f_{1:m}} f_k : f_{1:m} \in \times_{k=1}^m A_k\}$  for some  $m$  in  $\mathbb{N}$ ,  $A_1, \dots, A_m$  in  $\mathcal{L}^s(\mathcal{X}_{I \cup O})_{>0} \cup \mathcal{A}_{I \rightarrow O}^{\text{irr}}$ , and coefficients  $\lambda_k^{f_{1:m}} > 0$  for all  $f_{1:m}$  in  $\times_{k=1}^m A_k$ . Without loss of generality, assume that  $A_1, \dots, A_\ell \in \mathcal{A}_{I \rightarrow O}^{\text{irr}}$  and  $A_{\ell+1}, \dots, A_m \in \mathcal{L}^s(\mathcal{X}_{I \cup O})_{>0}$  for some  $\ell$  in  $\{0, \dots, m\}$ . Consider the special subset  $P := \{f_{1:m} \in \times_{k=1}^m A_k : \lambda_{1:\ell}^{f_{1:m}} = 0\}$  of  $\times_{k=1}^m A_k$ . If  $P \neq \emptyset$ , then for every element  $g_{1:m}$  of  $P$  we have that  $\sum_{k=1}^m \lambda_k^{g_{1:m}} g_k > 0$ , so  $B \cap \mathcal{L}(\mathcal{X}_{I \cup O})_{>0} \neq \emptyset$ , and therefore also  $A \cap \mathcal{L}(\mathcal{X}_{I \cup O})_{>0} \neq \emptyset$ , whence  $\{\sum_{x_I \in \mathcal{X}_I} h(x_I, \cdot) : h \in A\} \in K_O$  by the coherence of  $K_O$  [more specifically, by Axioms  $K_2$  and  $K_4$ ]. So assume that  $P = \emptyset$ , and define the coefficients

$$\mu_k^{f_{1:m}} := \begin{cases} \lambda_k^{f_{1:m}} & \text{if } k \leq \ell \\ 0 & \text{if } k \geq \ell + 1 \end{cases}$$

for all  $f_{1:m}$  in  $\times_{k=1}^m A_k$  and  $k$  in  $\{1, \dots, m\}$ . Because  $P = \emptyset$ , for every  $f_{1:m}$  in  $\times_{k=1}^m A_k$  we have that  $\mu_{1:\ell}^{f_{1:m}} = \lambda_{1:\ell}^{f_{1:m}} > 0$ . Also, for every  $f_{1:m}$  in  $\times_{k=1}^m A_k$  and  $k \geq \ell + 1$ , the coefficient  $\mu_k^{f_{1:m}}$  equals 0, so we identify  $\mu_{1:m}^{f_{1:m}}$  with  $\mu_{1:\ell}^{f_{1:m}}$ . Then every element of  $B' := \{\sum_{k=1}^m \mu_k^{f_{1:m}} f_k : f_{1:m} \in \times_{k=1}^m A_k\} = \{\sum_{k=1}^{\ell} \mu_k^{f_{1:\ell}} f_k : f_{1:\ell} \in \times_{k=1}^{\ell} A_k\}$  is dominated by an element of  $B$ . For every  $k$  in  $\{1, \dots, \ell\}$  the gamble set  $A_k$  belongs to  $\mathcal{A}_{I \rightarrow O}^{\text{irr}}$ , so we may write  $A_k = \mathbb{I}_{E_k}A_{O,k}$  with  $E_k \in \mathcal{P}_{\emptyset}(\mathcal{X}_I)$  and  $A_{O,k} \in K_O$ . Therefore  $|A_k| = |A_{O,k}|$ , and every  $f_k$  in  $A_k$  can be uniquely written as  $f_k = \mathbb{I}_{E_k}g_k$  with  $g_k$  in  $A_{O,k}$ . So for every  $f_{1:\ell}$  in  $\times_{k=1}^{\ell} A_k$  there is a unique  $g_{1:\ell}$  in  $\times_{k=1}^{\ell} A_{O,k}$  such that  $f_k = \mathbb{I}_{E_k}g_k$  for every  $k$  in

<sup>6</sup> These two conditions are equivalent to  $\emptyset \notin \mathcal{A}_{I \rightarrow O}^{\text{irr}}$  and  $\{0\} \notin \text{Posi}(\mathcal{L}^s(\mathcal{X}_{I \cup O})_{>0} \cup \mathcal{A}_{I \rightarrow O}^{\text{irr}})$ .

$\{1, \dots, \ell\}$ . For every  $f_{1:\ell}$  in  $\times_{k=1}^{\ell} A_k$  and its corresponding unique  $g_{1:\ell}$  in  $\times_{k=1}^{\ell} A_{O,k}$ , we define  $\mu_{1:\ell}^{g_{1:\ell}} := \mu_{1:\ell}^{f_{1:\ell}}$ . Therefore  $B' = \{\sum_{k=1}^{\ell} \mu_k^{g_{1:\ell}} \mathbb{I}_{E_k} g_k : g_{1:\ell} \in \times_{k=1}^{\ell} A_{O,k}\}$ , and hence

$$\begin{aligned} & \left\{ \sum_{x_I \in \mathcal{X}_I} h(x_I, \bullet) : h \in B' \right\} \\ &= \left\{ \sum_{x_I \in \mathcal{X}_I} \sum_{k=1}^{\ell} \mu_k^{g_{1:\ell}} \mathbb{I}_{E_k} g_k(x_I, \bullet) : g_{1:\ell} \in \times_{k=1}^{\ell} A_{O,k} \right\} \\ &= \left\{ \sum_{k=1}^{\ell} \mu_k^{g_{1:\ell}} |E_k| g_k(x_I, \bullet) : g_{1:\ell} \in \times_{k=1}^{\ell} A_{O,k} \right\} \end{aligned}$$

belongs to  $\text{Posi}(K_O) = K_O$ . Since every element of  $B'$  is dominated by an element of  $B$ , we have that every element of  $\{\sum_{x_I \in \mathcal{X}_I} h(x_I, \bullet) : h \in B'\}$  is dominated by an element of  $\{\sum_{x_I \in \mathcal{X}_I} h(x_I, \bullet) : h \in B\}$ , so by Lemma 27  $\{\sum_{x_I \in \mathcal{X}_I} h(x_I, \bullet) : h \in B\} \in K_O$ . By K<sub>4</sub> we have that also indeed  $\{\sum_{x_I \in \mathcal{X}_I} h(x_I, \bullet) : h \in A\} \in K_O$ . ■
